# Supplementary material for: Are Drugs Associated with Microscopic Colitis? A Systematic Review and Meta-Analysis
Source: MDPI journal article supplement (doi:10.3390/diseases11010006), 2022-12-29
Supplement: s1 [file s1]

| Study name            | Study design and study period    | Age cases | Age control | Total N | Male   | Female | cases  | Control              |
|-----------------------|----------------------------------|-----------|-------------|---------|--------|--------|--------|----------------------|
| Mohammad et al. 2022  | Retrospective Cohort (1999-2018) | NA        | NA          | 1130    | 880    | 250    | 1130   | Number not specified |
| Sandler et al 2021    | Case control (2015-2020)         | 63.2±12.7 | 54.5±11     | 362     | 92     | 270    | 110    | 252                  |
| Weimer et al, 2022    | Case-control (2001-2016)         | 65        | 67          | 156,783 | 4175   | 10127  | 14302  | 142481               |
| Zylberberg et al 2021 | Case control (2007-2016)         | 63.1±15.6 | 63.1±15.7   | 1012    | 289    | 723    | 344    | 668                  |
| Bonderup et al, 2018  | Case-control 2004-2013           | 68(59-77) | 68(59-77)   | 112,303 | 32,714 | 79,589 | 10,652 | 101,381              |
| Verhaegh et al, 2016  | Case Control (1992-2013)         | 63.3      | 63.2        | 7252    | 1943   | 5309   | 1211   | 6041                 |
| Masclee et al, 2015   | Case-control (1991-2012)         | 45.3±2    | 45.7±1.7    | 15,738  | 4056   | 11682  | 218    | 15520                |
| Guagnozzi et al, 2015 | Case control (2008-2011)         | 50.2±20.2 | 48.6±17.8   | 363     | 142    | 221    | 46     | 317                  |
| Keszhelyi et al, 2010 | Case-control (2005-2009)         | 58±1      | NA          | 491     | 167    | 324    | 136    | 355                  |
| Pascua et al, 2010    | Case control (2002-2007)         | 68.9      | 69.5        | 544     | 174    | 370    | 26     | 518                  |
| Fernando et al, 2007  | Case-Control (NA)                | 64.2±6.4  | 56.2±1.8    | 233     | 65     | 168    | 78     | 155                  |
| Fernando et al, 2013  | Case-control (2007-2010)         | 62.4±0.2  | 62.4±1.4    | 318     | 85     | 233    | 190    | 128                  |
| Bonderup et al, 2014  | Case-control (2005-2011)         | 65.6±3.6  | NA          | 7953    | 3884   | 4069   | 5751   | 2202                 |

Supplementary Table S1: Characteristics of the studies included in systematic review and meta-analysis.
