# Supplementary material for: Are Drugs Associated with Microscopic Colitis? A Systematic Review and Meta-Analysis
Source: MDPI journal article supplement (doi:10.3390/diseases11010006), 2022-12-29
Supplement: s1 [file s1]

| Study                    | Clearly stated aim | Inclusion of consecutive patients | Prospective collection of data | Endpoints appropriate to the aim of the study | Unbiased assessment of the study endpoint | Follow-up period appropriate to the aim of the study | Loss to follow up less than 5% | Prospective calculation of the study size | An adequate control group | Contemporary groups | Baseline equivalence of groups | Adequate statistical analyses | Total Score |
|--------------------------|--------------------|-----------------------------------|--------------------------------|-----------------------------------------------|-------------------------------------------|------------------------------------------------------|--------------------------------|-------------------------------------------|---------------------------|---------------------|--------------------------------|-------------------------------|-------------|
| Bonderup et al.2018      | 2                  | 2                                 | 2                              | 2                                             | 0                                         | 2                                                    | 2                              | 0                                         | 2                         | 2                   | 0                              | 2                             | 18          |
| Fernandez-Banares et al. | 2                  | 2                                 | 2                              | 2                                             | 0                                         | 2                                                    | 2                              | 0                                         | 2                         | 2                   | 0                              | 2                             | 18          |
| Fernandez-Banares et al. | 2                  | 2                                 | 2                              | 2                                             | 0                                         | 2                                                    | 2                              | 0                                         | 2                         | 2                   | 1                              | 2                             | 19          |
| Guagnozzi et al.         | 2                  | 2                                 | 2                              | 2                                             | 0                                         | 2                                                    | 2                              | 0                                         | 2                         | 2                   | 1                              | 2                             | 19          |
| Keszhelyi et al.         | 2                  | 2                                 | 2                              | 2                                             | 0                                         | 2                                                    | 2                              | 0                                         | 2                         | 2                   | 0                              | 2                             | 20          |
| Masclee et al.           | 2                  | 2                                 | 2                              | 2                                             | 0                                         | 2                                                    | 2                              | 0                                         | 2                         | 2                   | 1                              | 2                             | 19          |
| Mohammed et al.          | 2                  | 2                                 | 2                              | 2                                             | 0                                         | 2                                                    | 2                              | 0                                         | 2                         | 2                   | 0                              | 1                             | 17          |
| Pascua et al.            | 2                  | 2                                 | 2                              | 2                                             | 0                                         | 2                                                    | 2                              | 0                                         | 2                         | 2                   | 1                              | 2                             | 19          |
| Sandler et al.           | 2                  | 2                                 | 2                              | 2                                             | 0                                         | 2                                                    | 0                              | 0                                         | 2                         | 2                   | 1                              | 2                             | 17          |

|                      |   |   |   |   |   |   |   |   |   |   |   |   |    |
|----------------------|---|---|---|---|---|---|---|---|---|---|---|---|----|
| Verhaegh et al.      | 2 | 2 | 2 | 2 | 0 | 2 | 2 | 0 | 2 | 2 | 1 | 2 | 19 |
| Weimers et al.       | 2 | 2 | 2 | 2 | 0 | 2 | 2 | 0 | 2 | 2 | 1 | 2 | 19 |
| Zylberberg et al.    | 2 | 2 | 2 | 2 | 0 | 2 | 2 | 0 | 2 | 2 | 1 | 2 | 19 |
| Bonder Up et al 2014 | 2 | 2 | 2 | 2 | 0 | 2 | 2 | 0 | 2 | 2 | 0 | 2 | 18 |

Supplementary Table S2: Quality assessment of included studies using Minors criteria.
